# Supplementary material
Source: PubMed Central journal article supplement (PMC8755593)
Supplement: NIHMS1753656-supplement-2.pdf [file NIHMS1753656-supplement-2.pdf]

**Supplementary Table 1.** *Fusobacterium* species detected across 2008 colorectal tumor samples.

| <i>Fusobacterium</i><br>species | read abundance<br>(ppm) | percent (%) | prevalence (# of samples<br>detected) |
|---------------------------------|-------------------------|-------------|---------------------------------------|
| <i>nucleatum</i>                | 0.4957                  | 92.2203     | 206                                   |
| <i>periodonticum</i>            | 0.0130                  | 2.4261      | 12                                    |
| <i>necrophorum</i>              | 0.0101                  | 1.8808      | 8                                     |
| <i>varium</i>                   | 0.0070                  | 1.3017      | 1                                     |
| <i>canifelinum</i>              | 0.0034                  | 0.6288      | 2                                     |
| <i>mortiferum</i>               | 0.0027                  | 0.5084      | 3                                     |
| <i>gonidiaformans</i>           | 0.0027                  | 0.5071      | 3                                     |
| <i>russii</i>                   | 0.0013                  | 0.2347      | 1                                     |
| <i>equinum</i>                  | 0.0009                  | 0.1729      | 1                                     |

  

| F <i>nucleatum</i><br>subspecies | read abundance<br>(ppm) | percent (%) | prevalence (# of samples<br>detected) |
|----------------------------------|-------------------------|-------------|---------------------------------------|
| <i>animalis</i>                  | 0.34                    | 68.53       | 138                                   |
| <i>vincentii</i>                 | 0.07                    | 13.87       | 34                                    |
| <i>nucleatum</i>                 | 0.07                    | 13.87       | 26                                    |
| <i>polymorphum</i>               | 0.02                    | 3.72        | 18                                    |
