# Supplementary material
Source: PubMed Central journal article supplement (PMC8755593)
Supplement: NIHMS1753656-supplement-3.pdf [file NIHMS1753656-supplement-3.pdf]

**Supplementary Table 2.** Patients and tumor molecular characteristics as a function of the presence of *F nucleatum* subspecies in colorectal cancer tissues.

***F nucleatum subspecies animalis***

| Characteristic                            | <i>ssp animalis</i> -negative | <i>ssp animalis</i> -positive | OR (95% CI)*                       | OR (95% CI)**                      |
|-------------------------------------------|-------------------------------|-------------------------------|------------------------------------|------------------------------------|
| <b>Age at diagnosis +</b>                 |                               |                               |                                    |                                    |
| Mean                                      | 63.3                          | 62.9                          |                                    |                                    |
| N                                         | 1735                          | 116                           |                                    |                                    |
| <b>Sex</b>                                |                               |                               |                                    |                                    |
| Male                                      | 870 (50)                      | 46 (40)                       | Ref                                | Ref                                |
| Female                                    | 866 (50)                      | 70 (60)                       | 1.52 (1.04-2.25, p-val = 0.0313)   | 1.35 (0.91 - 2.02, p-val = 0.13)   |
| sample size                               | 1736                          | 116                           |                                    |                                    |
| <b>Cancer stage</b>                       |                               |                               |                                    |                                    |
| stage I                                   | 482 (35)                      | 15 (19)                       | Ref                                | Ref                                |
| stage II                                  | 375 (27)                      | 28 (35)                       | 2.30 (1.21-4.53, p-val = 0.013)    | 2.20 (1.12 - 4.44, p-val = 0.024)  |
| stage III                                 | 362 (26)                      | 31 (39)                       | 2.55 (1.35-5.01, p-val = 0.005)    | 2.67 (1.38 - 5.38, p-val = 0.0041) |
| stage IV                                  | 150 (11)                      | 6 (8)                         | 1.25 (0.43-3.11, p-val = 0.65)     | 1.56 (0.53 - 4.13, p-val = 0.39)   |
| N                                         | 1369                          | 80                            |                                    |                                    |
| <b>Tumor site</b>                         |                               |                               |                                    |                                    |
| rectal                                    | 434 (25)                      | 16 (13.7)                     | Ref                                | Ref                                |
| distal                                    | 559 (32)                      | 25 (21.6)                     | 1.19 (0.63-2.31, p-val = 0.59)     | 1.12 (0.59-2.18, p-val = 0.72)     |
| proximal                                  | 743 (43)                      | 75 (65.7)                     | 2.75 (1.61-4.96, p-val = 0.00039)  | 1.76 (0.99-3.29, p-val = 0.065)    |
| left (rectal + distal)                    | 993 (57.2)                    | 41 (35.1)                     | Ref                                | Ref                                |
| right                                     | 743 (42.8)                    | 75 (64.7)                     | 2.47 (1.67-3.71, p-val = 8.2e-06)  | 1.64(1.05-2.57, p-val = 0.029)     |
| N                                         | 1736                          | 116                           |                                    |                                    |
| <b>Hypermutation status</b>               |                               |                               |                                    |                                    |
| non-hypermutated                          | 1455 (84)                     | 77 (66)                       | Ref                                | Ref                                |
| hypermutated                              | 281 (16)                      | 39 (34)                       | 2.59 (1.70-3.89, p-val = 5.76e-06) | 0.51 (0.24-1.1, p-val = 0.07)      |
| N                                         | 1736                          | 116                           |                                    |                                    |
| <b>Microsatellites instability status</b> |                               |                               |                                    |                                    |
| MSS                                       | 1495 (86)                     | 73 (63)                       | Ref                                | Ref                                |
| MSI                                       | 241 (14)                      | 43 (37)                       | 2.84 (1.81-4.43, p-val = 4.86e-06) | 3.81 (1.84-7.71, p-val = 0.00025)  |
| N                                         | 1736                          | 116                           |                                    |                                    |

***F nucleatum subspecies vincentii and nucleatum***

| Characteristic                              | other <i>ssp</i> (not <i>animalis</i> )-negative | other <i>ssp</i> (not <i>animalis</i> )-positive | OR (95% CI)*                    | OR (95% CI)***                    |
|---------------------------------------------|--------------------------------------------------|--------------------------------------------------|---------------------------------|-----------------------------------|
| <b>Age at diagnosis+</b>                    |                                                  |                                                  |                                 |                                   |
| Mean                                        | 63.3                                             | 65.5                                             |                                 |                                   |
| sample size                                 | 1809                                             | 42                                               |                                 |                                   |
| <b>Sex</b>                                  |                                                  |                                                  |                                 |                                   |
| Male                                        | 899 (50)                                         | 17 (40)                                          | Ref                             | Ref                               |
| Female                                      | 911 (50)                                         | 25 (60)                                          | 1.46 (0.79-2.77, p-val = 0.23)  | 1.40 (0.75-2.67, p-val = 0.30)    |
| N                                           | 1810                                             | 42                                               |                                 |                                   |
| <b>Cancer stage</b>                         |                                                  |                                                  |                                 |                                   |
| stage I                                     | 486 (34)                                         | 11 (30)                                          | Ref                             | Ref                               |
| stage II                                    | 390 (28)                                         | 13 (35)                                          | 1.75 (0.76-4.15, p-val = 0.19)  | 2.0 (0.84 - 4.96, p-val = 0.12)   |
| stage III                                   | 385 (27)                                         | 8 (22)                                           | 1.13 (0.42-2.91, p-val = 0.81)  | 1.20 (0.44 -3.17, p-val = 0.72)   |
| stage IV                                    | 151 (11)                                         | 5 (14)                                           | 1.82 (0.56-5.23, p-val = 0.28)  | 2.1 (0.62 - 6.2, p-val = 0.20)    |
| N                                           | 1412                                             | 37                                               |                                 |                                   |
| <b>Tumor site</b>                           |                                                  |                                                  |                                 |                                   |
| rectal                                      | 441 (24.4)                                       | 9 (21.4)                                         | Ref                             | Ref                               |
| distal                                      | 569 (31.4)                                       | 15 (35.7)                                        | 1.26 (0.55-3.02, p-val = 0.59)  | 1.26 (0.55-3.04, p-val = 0.60)    |
| proximal                                    | 800 (44.2)                                       | 18 (42.9)                                        | 1.0 (0.45-2.36, p-val = 0.99)   | 0.78 (0.32-1.93, p-val = 0.56)    |
| left (rectal + distal)                      | 1010 (55.8)                                      | 24 (57.1)                                        | Ref                             | Ref                               |
| right (proximal)                            | 800 (44.2)                                       | 18 (42.9)                                        | 0.87 (0.46-1.62, p-val = 0.66)  | 0.67 (0.32-1.33, p-val = 0.26)    |
| N                                           | 1810                                             | 42                                               |                                 |                                   |
| <b>Hypermutation status</b>                 |                                                  |                                                  |                                 |                                   |
| non-hypermutated                            | 1498 (82.8)                                      | 34 (81)                                          | Ref                             | Ref                               |
| hypermutated                                | 312 (17.2)                                       | 8 (19)                                           | 1.03 (0.44-2.16, p-val = 0.942) | 0.27 (0.08 - 0.97, p-val = 0.043) |
| N                                           | 1810                                             | 42                                               |                                 |                                   |
| <b>Microsatellites instability status**</b> |                                                  |                                                  |                                 |                                   |
| MSS                                         | 1536 (85)                                        | 32 (76)                                          | Ref                             | Ref                               |
| MSI                                         | 274 (15)                                         | 10 (24)                                          | 1.84 (0.79-4.08, p-val = 0.14)  | 3.81 (1.13-11.27, p-val = 0.022)  |
| N                                           | 1810                                             | 42                                               |                                 |                                   |

(+)To compare age at diagnosis, analysis of variance was performed (for *F nucleatum subspecies animalis* p-value = 0.71, and for *F nucleatum subspecies vincentii* and *nucleatum* p-value = 0.25); \*Adjusted for age and sex; \*\*Adjusted for age at diagnosis, sex, tumor site, hyper mutation status, MSI status and mutations in *POLE*, *TP53* and *ERBB3* (for models investigating hypermutation and MSI status, those variables were only included once in the model);

\*\*\*Adjusted for age, sex, tumor site, hyper mutation status, MSI; OR = Odd Ratio; CI = Confidence Interval
