# Supplementary material
Source: PubMed Central journal article supplement (PMC8755593)
Supplement: NIHMS1753656-supplement-4.pdf [file NIHMS1753656-supplement-4.pdf]

**Supplementary Table 3.** The hazard ratios with 95% confidence intervals for *F nucleatum* and its subspecies based on propensity score methods.

***F nucleatum (models 1 and 2)***

| <b>Not adjusting for tumor stage</b>                                | <b>Method for propensity score</b> | <b>HR (95% CI)</b> | <b>p-value</b> |
|---------------------------------------------------------------------|------------------------------------|--------------------|----------------|
| Model 1: Cox model stratified by categorized propensity score       | Logistic                           | 1.88 (1.27-2.78)   | 0.002          |
|                                                                     | CBPS                               | 1.84 (1.26-2.70)   | 0.002          |
|                                                                     | GBM                                | 1.93 (1.30-2.86)   | 0.001          |
| Model 2: Cox model with categorized propensity score as a covariate | Logistic                           | 1.86 (1.25-2.76)   | 0.002          |
|                                                                     | CBPS                               | 1.82 (1.24-2.68)   | 0.002          |
|                                                                     | GBM                                | 1.94 (1.30-2.89)   | 0.001          |
| <b>Adjusting for tumor stage</b>                                    | <b>Method for propensity score</b> | <b>HR (95% CI)</b> | <b>p-value</b> |
| Model 1: Cox model stratified by categorized propensity score       | Logistic                           | 1.59 (1.05-2.41)   | 0.027          |
|                                                                     | CBPS                               | 1.49 (1.03-2.16)   | 0.036          |
|                                                                     | GBM                                | 1.75 (1.15-2.66)   | 0.01           |
| Model 2: Cox model with categorized propensity score as a covariate | Logistic                           | 1.60 (1.05-2.43)   | 0.028          |
|                                                                     | CBPS                               | 1.48 (1.02-2.16)   | 0.038          |
|                                                                     | GBM                                | 1.74 (1.14-2.67)   | 0.011          |

***F nucleatum subspecies (model 3)***

| <b>Not adjusting for tumor stage</b> | <b>Method for propensity score</b> | <b>HR (95% CI)</b> | <b>p-value</b> |
|--------------------------------------|------------------------------------|--------------------|----------------|
| <i>F subsp animalis</i>              | Multinomial                        | 2.41 (1.45-4.01)   | 0.001          |
|                                      | CBPS                               | 2.33 (1.52-3.56)   | 0.000          |
|                                      | GBM                                | 2.11 (1.31-3.40)   | 0.002          |
| <i>F subsp vincentii + nucleatum</i> | Multinomial                        | 0.74 (0.29-1.90)   | 0.531          |
|                                      | CBPS                               | 0.75 (0.37-1.54)   | 0.434          |
|                                      | GBM                                | 0.77 (0.30-1.95)   | 0.575          |
| <b>Adjusting for tumor stage</b>     | <b>Method for propensity score</b> | <b>HR (95% CI)</b> | <b>p-value</b> |
| <i>F subsp animalis</i>              | Multinomial                        | 1.64 (0.79-3.40)   | 0.186          |
|                                      | CBPS                               | 1.56 (1.13-2.17)   | 0.007          |
|                                      | GBM                                | 1.61 (0.88-2.95)   | 0.124          |
| <i>F subsp vincentii + nucleatum</i> | Multinomial                        | 0.46 (0.17-1.23)   | 0.122          |
|                                      | CBPS                               | 0.55 (0.26-1.16)   | 0.114          |
|                                      | GBM                                | 0.64 (0.24-1.69)   | 0.371          |
