# Supplementary material
Source: PubMed Central journal article supplement (PMC8755593)
Supplement: NIHMS1753656-supplement-5.pdf [file NIHMS1753656-supplement-5.pdf]

**Supplementary Table 4.** The hazard ratios with 95% confidence intervals for *F nucleatum* , for each MSI status, based on multivariate Cox model and propensity based methods.

| <b>MSI=0</b>                                                        |                                    |                    |                |
|---------------------------------------------------------------------|------------------------------------|--------------------|----------------|
| <b>Not adjusting for tumor stage</b>                                | <b>Method for propensity score</b> | <b>HR (95% CI)</b> | <b>p-value</b> |
| Multivariate Cox model                                              |                                    | 2.13 (1.44-3.15)   | 0.000          |
| Model 1: Cox model stratified by categorized propensity score       | Logistic                           | 2.07 (1.39-3.10)   | 0.001          |
|                                                                     | CBPS                               | 2.04 (1.38-3.03)   | 0.002          |
|                                                                     | GBM                                | 1.96 (1.31-2.94)   | 0.001          |
| Model 2: Cox model with categorized propensity score as a covariate | Logistic                           | 2.07 (1.37-3.11)   | 0.001          |
|                                                                     | CBPS                               | 2.02 (1.35-3.03)   | 0.001          |
|                                                                     | GBM                                | 1.94 (1.29-2.93)   | 0.002          |
| <b>Adjusting for tumor stage</b>                                    | <b>Method for propensity score</b> | <b>HR (95% CI)</b> | <b>p-value</b> |
| Multivariate Cox model                                              |                                    | 1.83 (1.17-2.88)   | 0.009          |
| Model 1: Cox model stratified by categorized propensity score       | Logistic                           | 1.71 (1.07-2.73)   | 0.024          |
|                                                                     | CBPS                               | 1.69 (1.12-2.55)   | 0.012          |
|                                                                     | GBM                                | 1.70 (1.07-2.69)   | 0.024          |
| Model 2: Cox model with categorized propensity score as a covariate | Logistic                           | 1.71 (1.07-2.75)   | 0.025          |
|                                                                     | CBPS                               | 1.69 (1.11-2.56)   | 0.015          |
|                                                                     | GBM                                | 1.71 (1.07-2.72)   | 0.024          |
| <b>MSI=1</b>                                                        |                                    |                    |                |
| <b>Not adjusting for tumor stage</b>                                | <b>Method for propensity score</b> | <b>HR (95% CI)</b> | <b>p-value</b> |
| Multivariate Cox model                                              |                                    | 0.84 (0.21-3.34)   | 0.805          |
| Model 1: Cox model stratified by categorized propensity score       | Logistic                           | 1.05 (0.31-3.56)   | 0.938          |
|                                                                     | CBPS                               | 1.05 (0.31-3.58)   | 0.940          |
|                                                                     | GBM                                | 1.12 (0.35-3.59)   | 0.846          |
| Model 2: Cox model with categorized propensity score as a covariate | Logistic                           | 1.01 (0.30-3.40)   | 0.988          |
|                                                                     | CBPS                               | 1.05 (0.31-3.60)   | 0.937          |
|                                                                     | GBM                                | 1.16 (0.35-3.81)   | 0.804          |
| <b>Adjusting for tumor stage</b>                                    | <b>Method for propensity score</b> | <b>HR (95% CI)</b> | <b>p-value</b> |
| Multivariate Cox model                                              |                                    | 0.55 (0.09-3.21)   | 0.508          |
| Model 1: Cox model stratified by categorized propensity score       | Logistic                           | 0.90 (0.19-4.19)   | 0.890          |
|                                                                     | CBPS                               | 0.95 (0.21-4.31)   | 0.944          |
|                                                                     | GBM                                | 0.82 (0.21-3.18)   | 0.769          |
| Model 2: Cox model with categorized propensity score as a covariate | Logistic                           | 0.92 (0.19-4.38)   | 0.918          |
|                                                                     | CBPS                               | 0.96 (0.21-4.43)   | 0.956          |
|                                                                     | GBM                                | 0.80 (0.20-3.18)   | 0.756          |
