# Supplementary material
Source: PubMed Central journal article supplement (PMC8755593)
Supplement: NIHMS1753656-supplement-6.pdf [file NIHMS1753656-supplement-6.pdf]

**Supplementary Table 5.** The hazard ratios with 95% confidence intervals for *F nucleatum*, for each chemotherapy status, based on multivariate Cox model and propensity based methods.

| <b>Chemotherapy='Yes'</b>                                           |                                    |                    |                |
|---------------------------------------------------------------------|------------------------------------|--------------------|----------------|
| <b>Not adjusting for tumor stage</b>                                | <b>Method for propensity score</b> | <b>HR (95% CI)</b> | <b>p-value</b> |
| Multivariate Cox model                                              |                                    | 1.92 (1.07-3.45)   | 0.029          |
| Model 1: Cox model stratified by categorized propensity score       | Logistic                           | 1.88 (1.04-3.39)   | 0.037          |
|                                                                     | CBPS                               | 1.93 (1.11-3.36)   | 0.019          |
|                                                                     | GBM                                | 1.89 (1.04-3.44)   | 0.036          |
| Model 2: Cox model with categorized propensity score as a covariate | Logistic                           | 1.84 (1.01-3.37)   | 0.047          |
|                                                                     | CBPS                               | 1.87 (1.06-3.28)   | 0.031          |
|                                                                     | GBM                                | 1.85 (1.00-3.40)   | 0.049          |
| <b>Adjusting for tumor stage</b>                                    | <b>Method for propensity score</b> | <b>HR (95% CI)</b> | <b>p-value</b> |
| Multivariate Cox model                                              |                                    | 1.67 (0.84-3.33)   | 0.143          |
| Model 1: Cox model stratified by categorized propensity score       | Logistic                           | 1.79 (0.90-3.57)   | 0.097          |
|                                                                     | CBPS                               | 1.67 (0.84-3.31)   | 0.144          |
|                                                                     | GBM                                | 1.56 (0.77-3.16)   | 0.214          |
| Model 2: Cox model with categorized propensity score as a covariate | Logistic                           | 1.76 (0.87-3.54)   | 0.115          |
|                                                                     | CBPS                               | 1.65 (0.82-3.29)   | 0.159          |
|                                                                     | GBM                                | 1.55 (0.76-3.17)   | 0.227          |
| <b>Chemotherapy='No'</b>                                            |                                    |                    |                |
| <b>Not adjusting for tumor stage</b>                                | <b>Method for propensity score</b> | <b>HR (95% CI)</b> | <b>p-value</b> |
| Multivariate Cox model                                              |                                    | 0.42 (0.05-3.16)   | 0.397          |
| Model 1: Cox model stratified by categorized propensity score       | Logistic                           | 0.32 (0.02-4.18)   | 0.386          |
|                                                                     | CBPS                               | 0.36 (0.03-4.54)   | 0.432          |
|                                                                     | GBM                                | 0.41 (0.03-5.08)   | 0.491          |
| Model 2: Cox model with categorized propensity score as a covariate | Logistic                           | 0.31 (0.02-4.13)   | 0.378          |
|                                                                     | CBPS                               | 0.35 (0.03-4.48)   | 0.422          |
|                                                                     | GBM                                | 0.40 (0.03-4.94)   | 0.472          |
| <b>Adjusting for tumor stage</b>                                    | <b>Method for propensity score</b> | <b>HR (95% CI)</b> | <b>p-value</b> |
| Multivariate Cox model                                              |                                    | 0.32 (0.04-2.58)   | 0.285          |
| Model 1: Cox model stratified by categorized propensity score       | Logistic                           | 0.31 (0.03-3.75)   | 0.357          |
|                                                                     | CBPS                               | 0.40 (0.03-4.62)   | 0.463          |
|                                                                     | GBM                                | 0.65 (0.05-8.44)   | 0.741          |
| Model 2: Cox model with categorized propensity score as a covariate | Logistic                           | 0.31 (0.03-3.79)   | 0.359          |
|                                                                     | CBPS                               | 0.41 (0.03-4.80)   | 0.475          |
|                                                                     | GBM                                | 0.65 (0.05-8.67)   | 0.747          |
