# Supplementary material
Source: PubMed Central journal article supplement (PMC8755593)
Supplement: NIHMS1753656-supplement-7.pdf [file NIHMS1753656-supplement-7.pdf]

**Supplementary Table 6.** Proportions with 95% confidence intervals of *F nucleatum* positive in *ERBB3* non-mutated and mutant groups marginalized over covariate distribution, and average treatment effect (ATE) (proportion difference) with 95% confidence interval between the two groups.

|                           | Proportion of <i>F nucleatum</i> positive (95% CI) | <i>p</i> -value* |
|---------------------------|----------------------------------------------------|------------------|
| <i>ERBB3</i> non-mutation | 0.082 (0.064-0.101)                                |                  |
| <i>ERBB3</i> mutation     | 0.270 (0.133-0.407)                                |                  |
| ATE                       | 0.188 (0.051-0.326)                                | 0.007            |

\**p*-value was obtained for testing whether ATE is equal to zero based on 1000 bootstrapping samples.
