# Supplementary material
Source: PubMed Central journal article supplement (PMC8755593)
Supplement: NIHMS1753656-supplement-8.pdf [file NIHMS1753656-supplement-8.pdf]

**Supplementary Table 7.** Logistic regression analysis to assess independent associations of gene mutation status with the presence of *F nucleatum animalis* in colorectal cancer tissues.

| <b>Mutation status</b><br>mutated vs non-mutated | <b>Univariate OR</b><br><b>(95% CI)</b>  | <b>FDR p-value*</b> | <b>Multivariable OR</b><br><b>(95% CI)#</b> | <b>FDR p-value*</b> |
|--------------------------------------------------|------------------------------------------|---------------------|---------------------------------------------|---------------------|
| <i>KRAS</i>                                      | 1.27 (0.77-2.09,<br>p-val = 0.34)        | 0.38                | 1.32 (0.78-2.21,<br>p-val = 0.30)           | 0.67                |
| <i>TP53</i>                                      | 0.49 (0.33-0.72,<br>p-val = 0.00029)     | 0.0013              | 0.71<br>(0.46-1.1,<br>p-val = 0.089)        | 0.33                |
| <i>POLE</i>                                      | 3.21<br>(1.1-7.93,<br>p-val = 0.02)      | 0.042               | 4.03<br>(1.16-12.27,<br>p-val = 0.011)      | 0.085               |
| <i>ERBB2</i>                                     | 1.74<br>(0.51-4.55,<br>p-val = 0.31)     | 0.38                | 1.063<br>(0.29-3.0,<br>p-val = 0.916)       | 0.94                |
| <i>ERBB3</i>                                     | 7.56<br>(3.16-16.77,<br>p-val = 1.55e-6) | 1.40e-5             | 3.76<br>(1.44-9.19,<br>p-val = 0.0047)      | 0.043               |
| <i>APC</i>                                       | 0.64<br>(0.43-0.94,<br>p-val = 0.023)    | 0.042               | 0.90<br>(0.59-1.39,<br>p-val = 0.64)        | 0.94                |
| <i>BRAF</i>                                      | 2.34<br>(1.14-4.49,<br>p-val = 0.014)    | 0.042               | 1.03<br>(0.45-2.23,<br>p-val = 0.94)        | 0.94                |
| <i>PIK3CA</i>                                    | 1.44<br>(0.87-2.29,<br>p-val = 0.14)     | 0.21                | 1.19 (0.71-1.94,<br>p-val = 0.49)           | 0.89                |
| <i>SMAD4</i>                                     | 1.07<br>(0.55-1.91,<br>p-val = 0.83)     | 0.83                | 1.09<br>(0.55-1.97,<br>p-val = 0.79)        | 0.94                |

In the regression analysis, *F nucleatum* was used as a binary outcome variable (negative = 0 vs positive = 1) and gene mutation status as the predictor variable.

# logistic regression model adjusted for sex, age at diagnosis, tumour site, MSI and hypermutation status,

\*p-values were adjusted for multiple testing using the Benjamini-Hochberg method.

OR = Odds Ratio, CI = Confidence Interval, FDR = False Discovery Rate
